# Supplementary material
Source: publisher site journal article supplement (https://www.dovepress.com/article/525792)
Supplement: Supplementary file 1 [file 525792-supplementary%20figures%25252C%20tables_3.docx]

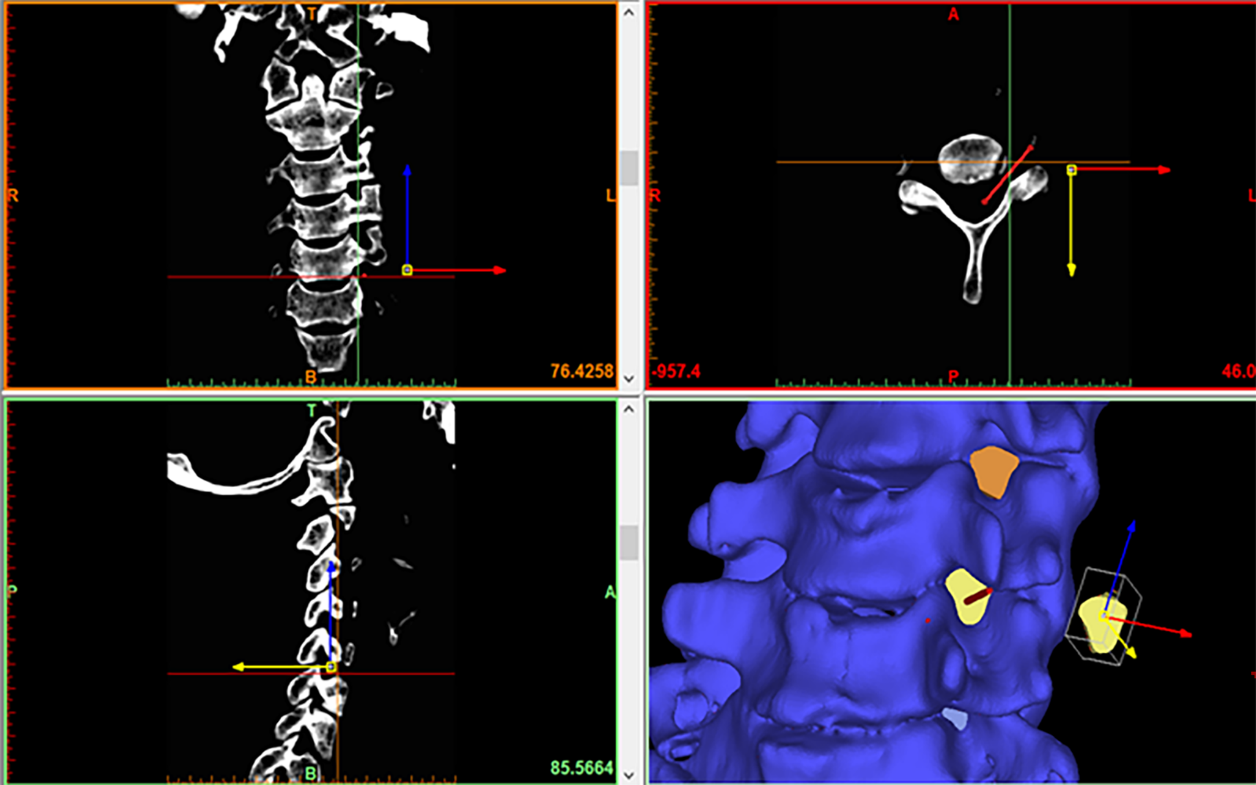


Supplementary Figure1. The cervical nerve root canal model and its center line were extracted by CT reconstruction in Mimic software. Three-dimensional CT data of the patient's cervical vertebra were obtained, and the cervical vertebra model of the target segment was reconstructed on Mimic software; Then, find the maximum intervertebral space plane of the target segment in the coronal position, make a center line, and then make an oblique line at an angle of 45 ° to the center line and pass through the nerve root canal. This oblique line is the center line of the nerve root canal of the target segment


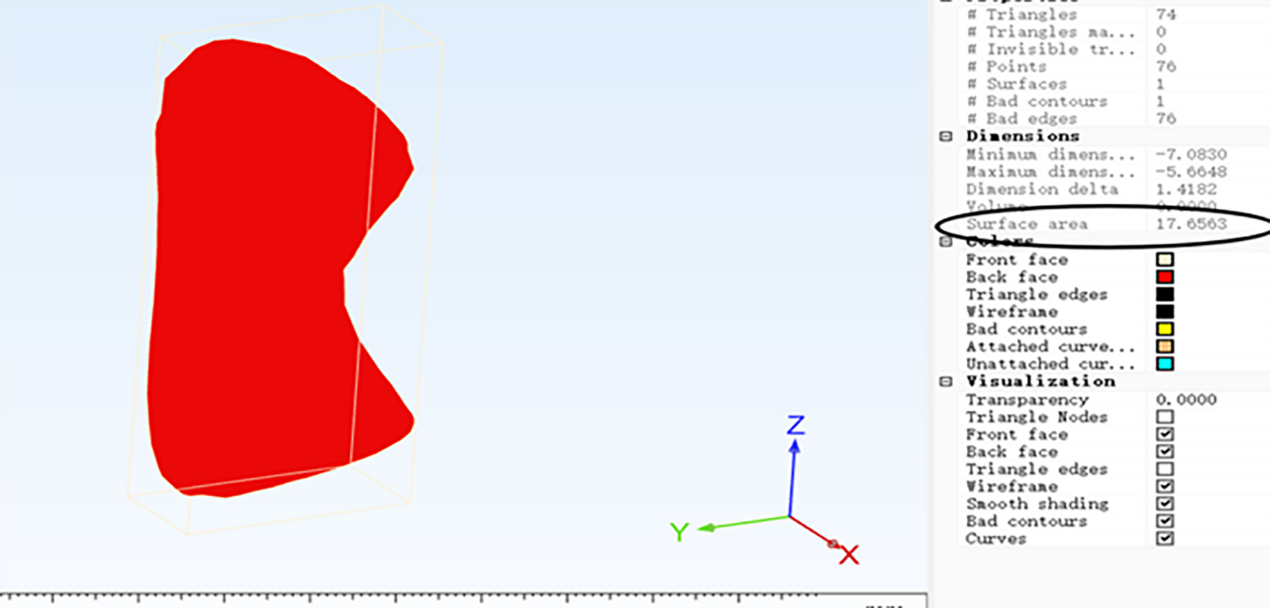


Supplementary Figure2. The established model of cervical nerve root canal and its center line were copied into 3-Matic software, and a series of continuous planes perpendicular to the center line of cervical nerve root canal were created in 3-Matic software, with an interval of 0.1 mm between each plane. These planes intersected with cervical nerve root canal to produce a continuous section


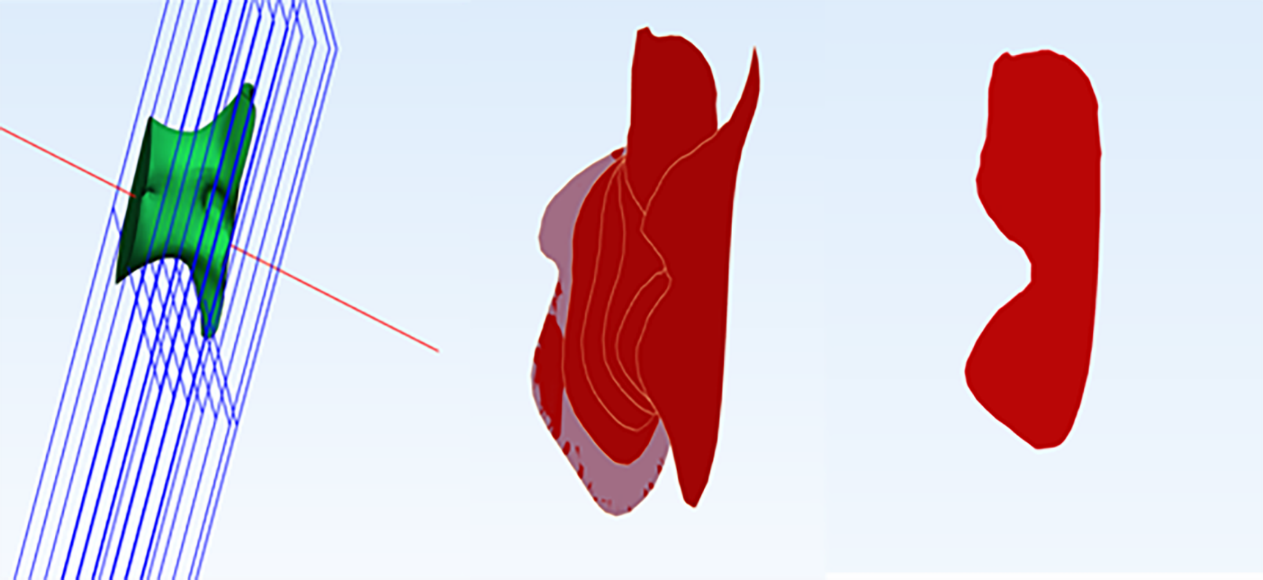


Supplementary Figure3. Use the software to extract, fill the sections and calculate the area of each section, and take the smallest section area, which is considered to be the smallest oblique sagittal area of the neural foramen.

| Supplementary Table1 Comparison of VAS Scores（X,SD）between two groups of patients | | | | | | |
| --- | --- | --- | --- | --- | --- | --- |
| VAS Arm Scores | | | | | | |
| Time After Surgery | A Group（n=48） | B Group （n=46） | A Group SD | B Group SD | t Value | P Value |
| Preop | 6.8 | 7.1 | 1.4 | 1.7 | -0.94 | >0.05 |
| 1 week | 5.9 | 6.1 | 1.2 | 1.4 | -0.74 | >0.05 |
| 6 weeks | 4.9 | 3.8 | 1.3 | 1.1 | 4.42 | <0.01 |
| 3 months | 4.1 | 2.5 | 1.2 | 0.8 | 7.57 | <0.01 |
| 6 months | 3.2 | 1.8 | 1.1 | 0.6 | 7.61 | <0.01 |
| VAS Neck Scores | | | | | | |
| Time After Surgery | A Group（n=48） | B Group（n=46） | A Group SD | B Group SD | t value | P Value |
| Preop | 5.9 | 6.2 | 1.6 | 1.8 | -0.85 | >0.05 |
| 1 week | 5.1 | 5.4 | 1.3 | 1.5 | -1.04 | >0.05 |
| 6 weeks | 4.8 | 4.5 | 1.2 | 1.1 | 1.26 | >0.05 |
| 3 months | 4.2 | 3.8 | 1 | 0.9 | 2.04 | 0.04 |
| 6 months | 4.1 | 2.4 | 1.1 | 0.9 | 8.18 | <0.01 |
| 12 months | 3.1 | 2.3 | 1 | 0.7 | 4.48 | <0.01 |
| Group A：patients who underwent nerve root canal decompression using conventional tools; Group B: patients who underwent nerve root canal decompression by ultrasonic bone scalpel; VAS：Visual Analogue Scale; | | | | | | |

| Supplementary table 2 Comparison of NDI Scores（X,SD）between two groups of patient | | | | | | |
| --- | --- | --- | --- | --- | --- | --- |
| NDI Scores | | | | | | |
| Time After Surgery | A Group （n=48） | B Group （n=46） | A Group SD | B Group SD | t Value | P Value |
| Preop | 58.2 | 61.3 | 10.3 | 9.8 | -1.49 | >0.05 |
| 1 week | 54.1 | 57.2 | 9.8 | 8.9 | -1.60 | >0.05 |
| 6 weeks | 49.3 | 45.2 | 8.5 | 7.6 | 2.46 | <0.01 |
| 3 months | 46.4 | 40.1 | 7.9 | 6.8 | 4.14 | <0.01 |
| 6 months | 45.4 | 39.5 | 7.3 | 5.7 | 4.35 | <0.01 |
| 12 months | 45.0 | 38.1 | 6.9 | 4.9 | 5.57 | <0.01 |
| Group A：patients who underwent nerve root canal decompression using conventional tools; Group B: patients who underwent nerve root canal decompression by ultrasonic bone scalpel; NDI: Neck Disability Index; SD: standard deviation | | | | | | |
